# Supplementary material for: How does perceived heat stress differ between urban forms and human vulnerability profiles? Case study Berlin
Source: Copernicus journal article supplement (doi:10.5194/nhess-25-2481-2025), 2025-07-24
Supplement: Supplementary file 1 [file nhess-25-2481-2025-supplement.pdf]

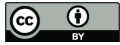

*Supplement of*

**How does perceived heat stress differ between urban forms and human vulnerability profiles? Case study Berlin**

**Nimra Iqbal et al.**

*Correspondence to:* Nimra Iqbal ([nimra.iqbal@ireus.uni-stuttgart.de](mailto:nimra.iqbal@ireus.uni-stuttgart.de))

The copyright of individual parts of the supplement might differ from the article licence.

## Contents

|    |                                                                                                             |           |
|----|-------------------------------------------------------------------------------------------------------------|-----------|
|    | <b>General .....</b>                                                                                        | <b>2</b>  |
|    | <b>File types in dataset.....</b>                                                                           | <b>2</b>  |
|    | <b>S1 Aggregation of urban structure types (USTs) related to residential use in the City of Berlin.....</b> | <b>3</b>  |
| 5  | S1.1 Dataset files .....                                                                                    | 3         |
|    | S1.2 Data purpose .....                                                                                     | 3         |
|    | S1.3 Data generation.....                                                                                   | 3         |
|    | S1.4 Data description.....                                                                                  | 4         |
|    | <b>S2 Household survey data.....</b>                                                                        | <b>5</b>  |
| 10 | S2.1 Dataset files .....                                                                                    | 5         |
|    | S2.2 Data purpose .....                                                                                     | 5         |
|    | S2.3 Data generation.....                                                                                   | 6         |
|    | S2.4 Data description.....                                                                                  | 6         |
|    | S2.5 Cross-tabulation of variables from household survey .....                                              | 7         |
| 15 | <b>S3 Earth observation (EO) data processing.....</b>                                                       | <b>9</b>  |
|    | S3.1 Dataset files .....                                                                                    | 9         |
|    | S3.2 Data purpose .....                                                                                     | 9         |
|    | S3.3 Data generation.....                                                                                   | 9         |
|    | S3.4 Data description.....                                                                                  | 10        |
| 20 | <b>References.....</b>                                                                                      | <b>11</b> |

## General

This document provides a comprehensive overview of dataset components of the household survey and earth observation data used for analysing perceived heat stress in different urban structure types (USTs) and in 39 selected PLRs (Fig. S2) for household survey in Berlin. It is a companion document to the main article that serves as a detailed reference for the data contents archived.

In the following, each dataset component (Table 1, Table 2 and Table 3 in the main paper) is discussed in its own section. Each section includes:

- 1) Overview of files included in the Zenodo archive.
- 2) Purpose of the dataset.
- 3) Data generation steps.
- 4) Detailed dataset description with meta information for all files provided.

## File types in dataset

File types of the datasets provided are described in Table S1.

**Table S1.** File formats used with descriptions and references. Links last accessed on 18/06/2024.

| File ending / format                 | Description              | Reference                                                                                                                                               |
|--------------------------------------|--------------------------|---------------------------------------------------------------------------------------------------------------------------------------------------------|
| *.zip                                | File compression         | <a href="https://www.loc.gov/preservation/digital/formats/fdd/fdd000354.shtml">https://www.loc.gov/preservation/digital/formats/fdd/fdd000354.shtml</a> |
| *.shp, *.shx, *.cpg,<br>*.dbf, *.prj | ESRI Shapefile           | <a href="https://www.loc.gov/preservation/digital/formats/fdd/fdd000280.shtml">https://www.loc.gov/preservation/digital/formats/fdd/fdd000280.shtml</a> |
| *.csv                                | Comma Separated Values   | <a href="https://www.loc.gov/preservation/digital/formats/fdd/fdd000323.shtml">https://www.loc.gov/preservation/digital/formats/fdd/fdd000323.shtml</a> |
| *.xlsx                               | Office Open XML          | <a href="https://www.loc.gov/preservation/digital/formats/fdd/fdd000398.shtml">https://www.loc.gov/preservation/digital/formats/fdd/fdd000398.shtml</a> |
| *.pdf                                | Portable Document Format | <a href="https://www.loc.gov/preservation/digital/formats/fdd/fdd000030.shtml">https://www.loc.gov/preservation/digital/formats/fdd/fdd000030.shtml</a> |

## S1 Aggregation of urban structure types (USTs) related to residential use in the City of Berlin

### S1.1. Dataset files

**Table S2.** Files in Zenodo archive.

| Compressed File                  | File types                                                                         | General description                                      | Details       |
|----------------------------------|------------------------------------------------------------------------------------|----------------------------------------------------------|---------------|
| USTs_residential_new_classes.zip | Polygons, ESRI shapefile format (zipped: *.shp, *.shx, *.sbn, *.cpg, *.dbf, *.prj) | USTs in Berlin with 7 aggregated residential new classes | Tables S4, S5 |

### S1.2. Data purpose

40 13 USTs in Berlin related to residential use are further aggregated into 7 classes (Fig. S1). The new classification (Table 1, main paper) ensures that USTs are sufficiently different, but also encompass a reduced number of classes that can be used within further assessment. The criteria were based on various physical and demographic parameters. Table A1 in the main paper presents detailed criteria used for this aggregation.

### S1.3. Data generation

45 The USTs aggregation used ArcGIS pro<sup>1</sup> version 3.1.1.

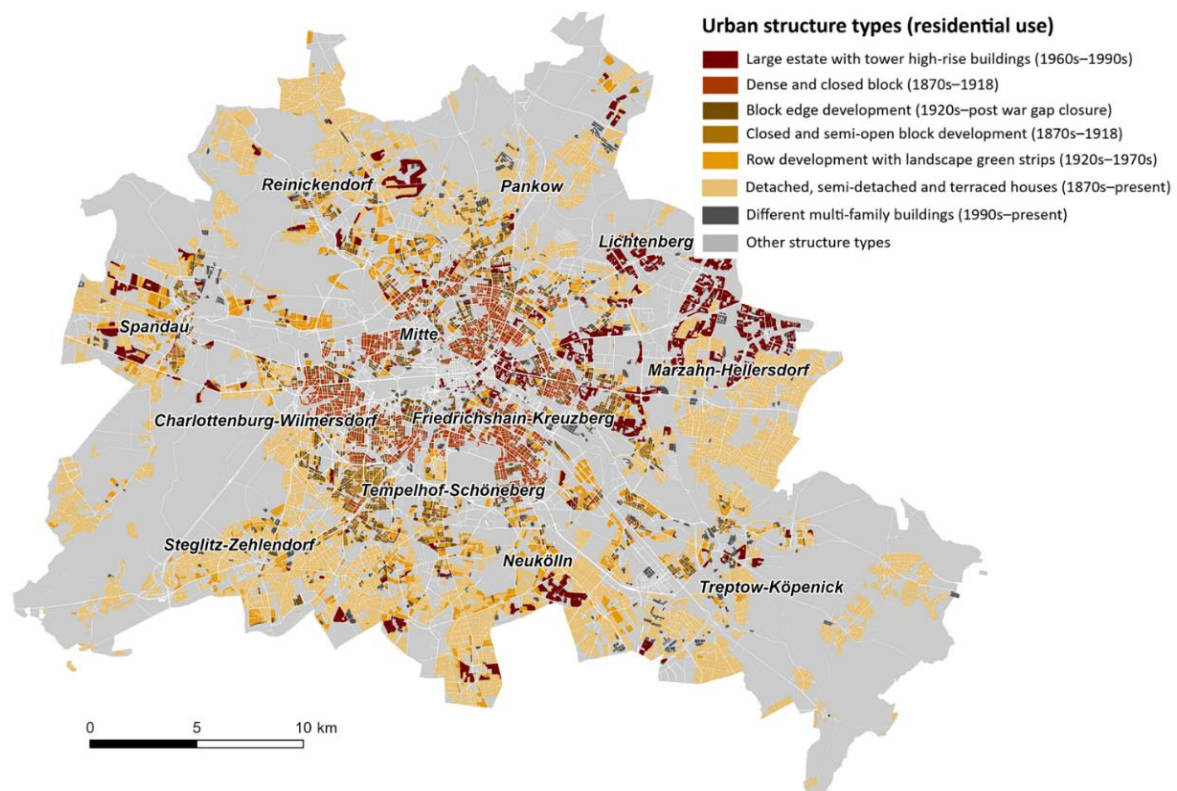

**Figure S1.** Urban structure types (USTs) residential new aggregated classes in Berlin using the data from Senatsverwaltung für Stadtentwicklung und Wohnen (2020)

#### Input files

50 Input data used in the production of this dataset are listed in Table S3.

**Table S3.** Data source used to aggregate USTs.

|                       | Source             | Resolution | Reference year |
|-----------------------|--------------------|------------|----------------|
| Urban structure types | Umweltatlas Berlin | Block      | 2020           |

<sup>1</sup> <https://www.esri.com/en-us/arcgis/products/arcgis-pro/resources>, last accessed 20/03/2024

#### S1.4. Data description

File formats and further meta information are given in Table S4, data attributes in Table S5.

**Table S4.** Files formats and meta information for the dataset.

|                             |                                                                        |
|-----------------------------|------------------------------------------------------------------------|
| Filename(s)                 | USTs_residential_new_classes.shp and *.shx, *.sbn, *.cpg, *.dbf, *.prj |
| Coordinate reference system | EPSG 25833; ETRS89 / UTM zone 33N                                      |
| Format, type                | ESRI shapefile; polygons                                               |
| Resolution                  | Block                                                                  |
| Reference year              | 2021                                                                   |
| Dataset attributes          | Table S5                                                               |

55 **Table S5.** Dataset (Table S1.3) attributes.

| Attribute name    | Unit           | Type   | Description                             |
|-------------------|----------------|--------|-----------------------------------------|
| <i>Schl5</i>      | –              | string | Unique ID of each block                 |
| <i>Typklar_EN</i> | –              | string | UST of the block                        |
| <i>SHAPE_Area</i> | m <sup>2</sup> | float  | Area of the block                       |
| <i>Typ_Klar_B</i> | –              | string | USTs new aggregated classes (Figure S1) |

## S2. Household survey data

### S2.1. Dataset files

**Table S6.** Files in Zenodo archive.

| File               | File type | General description                                                             | Details       |
|--------------------|-----------|---------------------------------------------------------------------------------|---------------|
| Berlin_survey_data | *.xls     | Selected variables from the household survey in Berlin linked with USTs dataset | Tables S7, S8 |

### S2.2. Data purpose

Primary data on perceived heat and climate adaptation were obtained from a household survey conducted in Berlin in October 2022. To capture diverse groups and behaviors of people, 39 out of 542 PLRs (Fig. S2) were selected for a household survey in Berlin. The selection was based on multiple criteria such as heat exposure, population density, representation of different age groups, unemployment levels, and heat mortality rate. A total of 10,000 addresses were collected from the Population Register of Berlin, using stratified sampling. Survey invitations were posted to selected addresses, along with a QR code to access the online survey conducted using the Evasys online tool (Evasys GmbH, 2021). A total of 565 respondents from 8,000 households received invitation letters. It is important to mention that one PLR (No 39) was excluded from the analysis due to the small number of respondents.

The survey data provided insights into household perceptions and experiences regarding heat stress and their living conditions such as housing typologies, availability and access to green spaces, and adaptation options. The analysis particularly focused on the influence of sociodemographic characteristics (distinguished by age and income) and urban forms on risk perception, experience, and climate change adaptation options to heat stress in the city of Berlin.

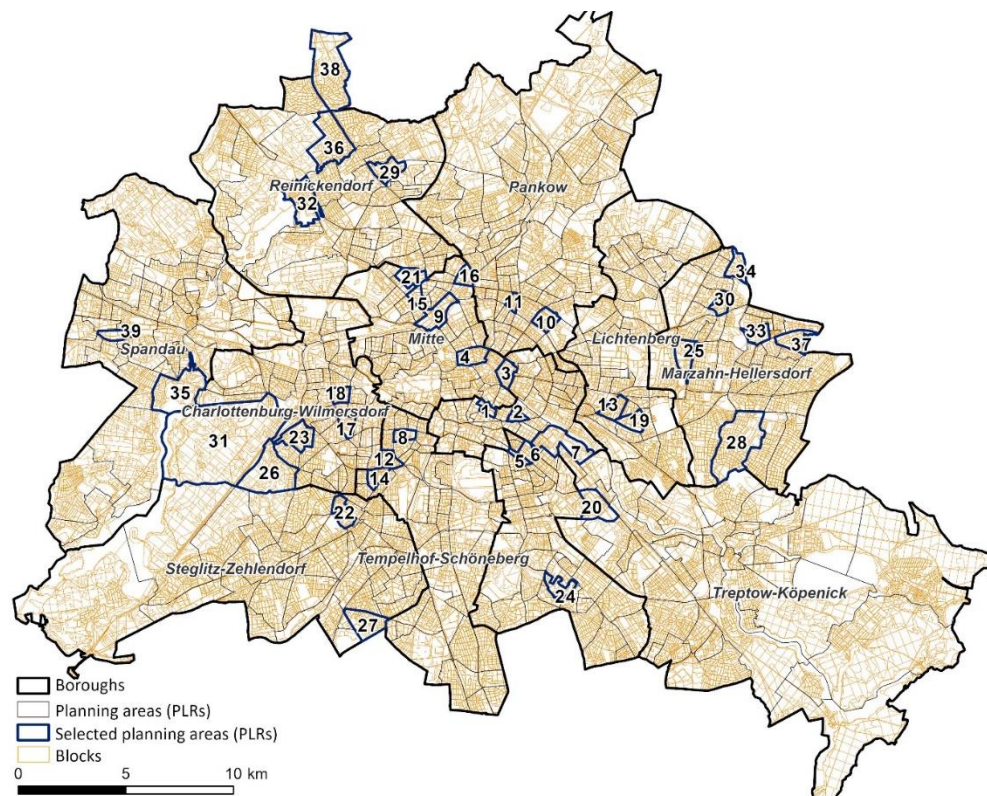

**Figure S2.** Berlin (a) administrative boundaries showing city (outer line), Boroughs (black), PLRs (grey, planning areas), and those selected for the household survey (blue, numbered 1 to 39) using data from Landesamt für Bürger- und Ordnungsangelegenheiten, 2022

### S2.3. Data generation

Household survey data was gathered using the online Evasys GmbH, 2021 tool. All processing done using IBM SPSS-29.0<sup>2</sup>. and R-2.15.0<sup>3</sup>.

### S2.4. Data description

**Table S7.** Files formats and meta information for the dataset.

|                    |                                                                |
|--------------------|----------------------------------------------------------------|
| Filename(s)        | Berlin_survey_data.xls                                         |
| Format             | Excel                                                          |
| Resolution         | PLRs (Landesamt für Bürger- und Ordnungsangelegenheiten, 2022) |
| Reference year     | 2022                                                           |
| Dataset attributes | Table S8                                                       |

**Table S8.** Aggregated dataset (Table SM2.5) attributes

| Attribute name                  | Type    | Description                                                                                                                                              |
|---------------------------------|---------|----------------------------------------------------------------------------------------------------------------------------------------------------------|
| Urban Structure Types (USTs)    | Nominal | Linked to the USTs (Fig. 1) below:                                                                                                                       |
|                                 |         | Large estate with tower high-rise buildings (1960s–1990s)                                                                                                |
|                                 |         | Dense and closed block (1870s–1918s)                                                                                                                     |
|                                 |         | Block edge development (1920s–post war gap closure)                                                                                                      |
|                                 |         | Closed and semi-open block development (1870s–1918)                                                                                                      |
| Perceived heat at neighbourhood | Ordinal | Row development with landscape green strips (1920 – 1970s)                                                                                               |
|                                 |         | Detached, semi-detached and terraced houses (1870s – present)                                                                                            |
|                                 |         | Different multi-family buildings (1990s – present)                                                                                                       |
|                                 |         | Other structure types                                                                                                                                    |
|                                 |         |                                                                                                                                                          |
| Open spaces                     | Nominal | Reponses recorded for:<br>How hot or cool do you think your neighbourhood is during a heatwave compared to the average outdoor temperature for the city? |
|                                 |         | Much cooler                                                                                                                                              |
|                                 |         | Slightly cooler                                                                                                                                          |
|                                 |         | No difference                                                                                                                                            |
|                                 |         | Slightly hotter                                                                                                                                          |
| Age group                       | Ordinal | Very hot                                                                                                                                                 |
|                                 |         | How would you describe the area right next to your house/apartment?                                                                                      |
|                                 |         | Lots of green (trees, meadow, lawn) and plenty of space between the buildings                                                                            |
|                                 |         | Lots of green (trees, meadow, lawn), but little space between buildings                                                                                  |
|                                 |         | Little green (trees, meadow, lawn) and a lot of space between the buildings                                                                              |
| Health Condition                | Nominal | Little green (trees, meadow, lawn), and little space between the buildings                                                                               |
|                                 |         | None of this applies to my living environment                                                                                                            |
|                                 |         |                                                                                                                                                          |
|                                 |         |                                                                                                                                                          |
|                                 |         |                                                                                                                                                          |
| Household income                | Ordinal | Have you already had problems with heat stress? If yes, which ones:                                                                                      |
|                                 |         | Lethargy/fatigue                                                                                                                                         |
|                                 |         | Trouble sleeping                                                                                                                                         |
|                                 |         | Difficulties in concentrating                                                                                                                            |
|                                 |         | Dizziness                                                                                                                                                |
|                                 |         | Nausea                                                                                                                                                   |
|                                 |         | Cardiovascular problems                                                                                                                                  |
|                                 |         | Heat stroke                                                                                                                                              |
|                                 |         |                                                                                                                                                          |
|                                 |         |                                                                                                                                                          |
|                                 |         | What is the monthly net income (Netto) of the household? (Netto = after deduction of taxes, social security contributions, etc.)                         |
|                                 |         | Less than 900 €                                                                                                                                          |
|                                 |         | 900 to under 1300 €                                                                                                                                      |
|                                 |         | 1300 to under 1700 €                                                                                                                                     |
|                                 |         | 1700 to under 2000 €                                                                                                                                     |
|                                 |         | 2000 to under 2300 €                                                                                                                                     |
|                                 |         | 2300 to under 2600 €                                                                                                                                     |
|                                 |         | 2600 to under 2900 €                                                                                                                                     |
|                                 |         | 2900 to under 3200 €                                                                                                                                     |
|                                 |         | 3200 to under 3600 €                                                                                                                                     |
|                                 |         | 3600 to under 4000 €                                                                                                                                     |
|                                 |         | 4000 to under 4500 €                                                                                                                                     |
|                                 |         | 4500 to under 5000 €                                                                                                                                     |
|                                 |         | 5000 to under 6000 €                                                                                                                                     |
|                                 |         | 6000 to under 7000 €                                                                                                                                     |
|                                 |         | 7000 € and above                                                                                                                                         |
|                                 |         |                                                                                                                                                          |
|                                 |         |                                                                                                                                                          |
|                                 |         |                                                                                                                                                          |
|                                 |         | Not specified                                                                                                                                            |

<sup>2</sup> <https://www.ibm.com/spss>, last accessed 20/03/2024

<sup>3</sup> <https://www.r-studio.com/>, last accessed 20/03/2024

|                   |         |                                                                                                                                                                                        |                         |                              |
|-------------------|---------|----------------------------------------------------------------------------------------------------------------------------------------------------------------------------------------|-------------------------|------------------------------|
| Adaptive measures | Nominal | Which of the following measure to protect against heatwaves have you already implemented or are you planning to implement (considering the change of weather in Berlin, as described)? |                         |                              |
|                   |         | Air conditioner installation                                                                                                                                                           |                         |                              |
|                   |         | Already implemented                                                                                                                                                                    | In plan/ implementation | Will be an option for future |
|                   |         | Neither today, nor future                                                                                                                                                              | Does not apply          |                              |

## S2.5. Cross-tabulation of variables from household survey

85 The percentage responses of perceived heat at neighbourhood and open spaces (description of the area next to house/apartment) are aggregated for 7 UST in the Table S9. The results from the cross-tabulation of different variables are reported in the paper in the section 3.2 and 3.3. Tables are provided as below:

**Table S9.** Urban Structure types, perceived heat and availability of open spaces

| Original survey question number     | 5.3                                           |                 |               |                 |          | 9.1                                                                           |                                                                         |                                                                             |                                                                            |                                               |
|-------------------------------------|-----------------------------------------------|-----------------|---------------|-----------------|----------|-------------------------------------------------------------------------------|-------------------------------------------------------------------------|-----------------------------------------------------------------------------|----------------------------------------------------------------------------|-----------------------------------------------|
| 6.2                                 | % responses of perceived heat at neighborhood |                 |               |                 |          | % responses of description of the area right next to house/apartment?         |                                                                         |                                                                             |                                                                            |                                               |
| Urban structure types               | Very cool                                     | Slightly cooler | No difference | Slightly hotter | Very hot | Lots of green (trees, meadow, lawn) and plenty of space between the buildings | Lots of green (trees, meadow, lawn), but little space between buildings | Little green (trees, meadow, lawn) and a lot of space between the buildings | Little green (trees, meadow, lawn), and little space between the buildings | None of this applies to my living environment |
| (semi-)detached and terraced houses | 6.3%                                          | 56.3%           | 15.0%         | 17.5%           | 5.0%     | 77.2%                                                                         | 19.0%                                                                   | 1.3%                                                                        | 2.5%                                                                       | 0.0%                                          |
| Row development                     | 1.5%                                          | 36.8%           | 25.0%         | 25.0%           | 11.8%    | 44.1%                                                                         | 25.0%                                                                   | 2.9%                                                                        | 26.5%                                                                      | 1.5%                                          |
| Closed/ semi-open block development | 0.0%                                          | 40.0%           | 20.0%         | 35.0%           | 5.0%     | 21.1%                                                                         | 47.4%                                                                   | 15.8%                                                                       | 10.5%                                                                      | 5.3%                                          |
| Block edge development              | 0.0%                                          | 21.0%           | 32.7%         | 38.3%           | 8.0%     | 22.0%                                                                         | 34.0%                                                                   | 5.0%                                                                        | 36.5%                                                                      | 2.5%                                          |
| Multi-family buildings              | 0.0%                                          | 26.5%           | 32.7%         | 34.7%           | 6.1%     | 33.3%                                                                         | 28.9%                                                                   | 4.4%                                                                        | 28.9%                                                                      | 4.4%                                          |
| Dense closed block                  | 0.0%                                          | 9.8%            | 23.2%         | 43.9%           | 23.2%    | 11.1%                                                                         | 39.5%                                                                   | 8.6%                                                                        | 34.6%                                                                      | 6.2%                                          |
| High-rise buildings                 | 1.1%                                          | 22.6%           | 20.4%         | 37.6%           | 18.3%    | 56.2%                                                                         | 29.2%                                                                   | 6.7%                                                                        | 6.7%                                                                       | 1.1%                                          |

90 The percentage responses of perceived heat and heat-related health issues i.e. cardiovascular problems are cross-tabulated with different age groups in the Table S10. Results are reported in the section 3.3.2 of the paper.

**Table S10.** Age groups, perceived heat and cardiovascular issues

| Original survey question number | 17.8                                          |                 |               |                 |          | 5.15                                   |       |           |        |       |
|---------------------------------|-----------------------------------------------|-----------------|---------------|-----------------|----------|----------------------------------------|-------|-----------|--------|-------|
| 14.1                            | % responses of perceived heat at neighborhood |                 |               |                 |          | % responses of cardiovascular problems |       |           |        |       |
| How old are you?                | Very cool                                     | Slightly cooler | No difference | Slightly hotter | Very hot | Very often                             | Often | Sometimes | Rarely | No    |
| 18-24 year                      | 0.0%                                          | 1.3%            | 2.2%          | 2.1%            | 3.1%     | 0.0%                                   | 3.0%  | 1.6%      | 1.2%   | 2.9%  |
| 25-34 year                      | 14.3%                                         | 13.0%           | 22.3%         | 17.3%           | 15.6%    | 16.1%                                  | 3.0%  | 10.5%     | 21.3%  | 20.1% |
| 35-44 year                      | 14.3%                                         | 13.0%           | 25.2%         | 17.8%           | 18.8%    | 25.8%                                  | 18.2% | 15.3%     | 14.0%  | 22.5% |
| 45-54 year                      | 0.0%                                          | 18.2%           | 15.1%         | 12.6%           | 12.5%    | 9.7%                                   | 9.1%  | 13.7%     | 15.9%  | 14.7% |
| 55-64 year                      | 28.6%                                         | 24.7%           | 20.1%         | 18.8%           | 20.3%    | 12.9%                                  | 27.3% | 26.6%     | 24.4%  | 15.2% |
| 65-74 year                      | 42.9%                                         | 20.8%           | 10.8%         | 20.9%           | 14.1%    | 19.4%                                  | 30.3% | 16.9%     | 14.6%  | 18.1% |
| 75-84 year                      | 0.0%                                          | 6.5%            | 3.6%          | 8.4%            | 15.6%    | 12.9%                                  | 3.0%  | 12.9%     | 6.7%   | 5.9%  |
| 85 year and above               | 0.0%                                          | 2.6%            | 0.7%          | 2.1%            | 0.0%     | 3.2%                                   | 6.1%  | 2.4%      | 1.8%   | 0.5%  |

95 The percentage responses of household monthly net income (€) are aggregated for 7 UST in the Table S11. and household monthly net income (€) is cross-tabulated with adaptation measure i.e., air conditioner installation (Table S12.). The results are reported in the section 3.3.2. of the paper.

**Table S11.** Urban Structure type and household monthly net income

| Original survey question number     | 17.8                                        |          |           |           |           |           |           |       |
|-------------------------------------|---------------------------------------------|----------|-----------|-----------|-----------|-----------|-----------|-------|
| 6.2                                 | % responses of household monthly net income |          |           |           |           |           |           |       |
| Urban structure types               | <900                                        | 900–1999 | 2000–2899 | 2900–3999 | 4000–4999 | 5000–5999 | 6000–6999 | ≥7000 |
| (semi-)detached and terraced houses | 0.0%                                        | 4.6%     | 10.8%     | 21.5%     | 24.6%     | 18.5%     | 0.0%      | 20.0% |
| Row development                     | 6.3%                                        | 12.7%    | 22.2%     | 23.8%     | 23.8%     | 7.9%      | 1.6%      | 1.6%  |
| Closed/ semi-open block development | 5.6%                                        | 0.0%     | 27.8%     | 16.7%     | 27.8%     | 11.1%     | 11.1%     | 0.0%  |
| Block edge development              | 1.4%                                        | 14.4%    | 24.0%     | 19.2%     | 20.5%     | 14.4%     | 2.1%      | 4.1%  |
| Multi-family buildings              | 4.5%                                        | 11.4%    | 13.6%     | 29.5%     | 15.9%     | 9.1%      | 4.5%      | 11.4% |
| Dense closed block                  | 1.4%                                        | 22.9%    | 7.1%      | 22.9%     | 18.6%     | 10.0%     | 5.7%      | 11.4% |
| High-rise buildings                 | 3.6%                                        | 21.4%    | 23.8%     | 21.4%     | 19.0%     | 9.5%      | 0.0%      | 1.2%  |



**Table S12.** Household monthly net income and adaptation measures

| Original survey question number | <b>17.8</b>                                                                    |          |           |           |           |           |           |       |
|---------------------------------|--------------------------------------------------------------------------------|----------|-----------|-----------|-----------|-----------|-----------|-------|
| <b>12.4</b>                     | % responses of household monthly net income vs installation of air conditioner |          |           |           |           |           |           |       |
| Air conditioner installation    | <900                                                                           | 900–1999 | 2000–2899 | 2900–3999 | 4000–4999 | 5000–5999 | 6000–6999 | ≥7000 |
| Already implemented             | 3.3%                                                                           | 10.0%    | 6.7%      | 26.7%     | 16.7%     | 20.0%     | 0.0%      | 16.7% |
| In plan/ implementation         | 0.0%                                                                           | 40.0%    | 20.0%     | 20.0%     | 20.0%     | 0.0%      | 0.0%      | 0.0%  |
| Will be an option for future    | 1.7%                                                                           | 6.8%     | 16.9%     | 23.7%     | 27.1%     | 3.4%      | 6.8%      | 13.6% |
| Neither today, nor future       | 3.0%                                                                           | 13.8%    | 17.2%     | 20.7%     | 22.4%     | 13.4%     | 2.6%      | 6.9%  |
| Does not apply                  | 3.4%                                                                           | 18.9%    | 20.9%     | 23.0%     | 16.9%     | 12.2%     | 1.4%      | 3.4%  |

### S3. Earth observation (EO) data processing

#### S3.1. Dataset files

**Table S13.** Files in Zenodo archive.

| File                               | Compressed file types                                                              | General description                                                                   | Details         |
|------------------------------------|------------------------------------------------------------------------------------|---------------------------------------------------------------------------------------|-----------------|
| Grass_Trees_fraction_Block.zip     | Polygons, ESRI shapefile format (zipped: *.shp, *.shx, *.sbn, *.cpg, *.dbf, *.prj) | Plan area fraction of grass and trees per block (Fig. S2) covering the city of Berlin | Tables S15, S16 |
| Shadow_fraction_Block(Sel_PLR).zip | Polygons, ESRI shapefile format (zipped: *.shp, *.shx, *.sbn, *.cpg, *.dbf, *.prj) | Shadow fraction per block (Fig. S2) within survey PLR                                 | Tables S17, S18 |

#### S3.2. Data purpose

Shadow fraction and vegetation fraction are used to assess urban living conditions within Berlin. This data is then coupled with USTs and perceived heat stress.

#### S3.3. Data generation

Throughout the day, shadows create a distinctive solar loss pattern, with the longest shadows occurring during the early morning and evening hours and the shortest occurring around noon. Shadow length is influenced by the height and spacing of buildings and trees, which impacts surface radiative heating/cooling. In addition, vegetation cover affects the surface airflow and radiational heating/cooling through evapotranspiration (Marando et al., 2022). To facilitate the analysis, the shadow indicator, which represents the fraction of shadows (ranging from 0–1), was developed for the summer of 2022 (June 1–August 31). Simulated hourly shadows for buildings and trees (Lindberg and Grimmond, 2011) during this period, at 1 m spatial resolution, were aggregated over time to estimate the shadow fraction for the entire summer.

The vegetation fraction, estimated at 10 m spatial resolution, used Sentinel-2 images for the summer of 2022 (Mitraka et al., 2017). Information on tree locations and heights at 1 m spatial resolution was obtained from local sources (Lindberg and Grimmond, 2011). Normalized difference vegetation index images were employed to assess low vegetation as well as overall vegetation abundance, resulting in a 10 m spatial resolution vegetation abundance image corresponding to summer months (June, July and August) 2022.

Analysis use different administrative spatial scales, viz (Fig. 2): Boroughs, PLRs (Planungsräume/ Planning areas), and blocks. The block scale USTs (Fig. 2b) data (e.g. grass, trees, and shadow fractions, Table S14) involves aggregating the raster data (Fig. 2). For calculation, pixels centroids within a block boundary but not in a building footprint are used.

#### Input files

Input data used in the production of this dataset are listed in Table S14.

**Table S14.** Data source used for calculating grass, trees and shadow fraction (Tables S3.3–S3.6).

|                 | Description                                                                                                                                                                | Source                                                 | Resolution | Reference year |
|-----------------|----------------------------------------------------------------------------------------------------------------------------------------------------------------------------|--------------------------------------------------------|------------|----------------|
| Grass fraction  | 1 m land cover data (2021) aggregated to 10 m to compare summer 2022 state using 10 m normalized difference vegetation index (NDVI from Sentinel-2) (Mitraka et al., 2017) | Copernicus Sentinel-2                                  | 10 m       | Summer 2022    |
| Trees fraction  | Same as grass fraction                                                                                                                                                     | Geoportal Berlin (2022a, 2022b), Copernicus Sentinel-2 | 10 m       | Summer 2022    |
| Shadow fraction | Hourly shadows from buildings and trees calculated with UMEP (Lindberg et al., 2018)                                                                                       | Geoportal Berlin (2022a, 2022b), Sentinel-2            | 1 m        | Summer 2022    |

### 130 S3.4. Data description

File formats and further meta information for plan area fraction of grass and trees per block are given in Table S15, data attributes in Table S16.

**Table S15.** Files formats and meta information for the dataset related to grass and trees fraction.

|                             |                                   |
|-----------------------------|-----------------------------------|
| Filename(s)                 | Grass_Trees_fraction_Block        |
| Coordinate reference system | EPSG 25833; ETRS89 / UTM zone 33N |
| Format, type                | ESRI shapefile; polygons          |
| Resolution                  | Block, vector                     |
| Reference year              | Summer (2022)                     |
| Dataset attributes          | Table S16                         |

**Table S16.** Dataset (Table S15) attributes.

| Attribute name          | Unit           | Type   | Description                             |
|-------------------------|----------------|--------|-----------------------------------------|
| <i>schl5 *</i>          | –              | string | Unique ID of each block                 |
| <i>SHAPE_Length</i>     | m              | float  | Length of the block                     |
| <i>SHAPE_Area</i>       | m <sup>2</sup> | float  | Area of the block                       |
| <i>typklar_ENG</i>      | –              | string | UST of the block                        |
| <i>Typ_Klar_Broader</i> | –              | string | USTs new aggregated classes (Figure S1) |
| <i>Ring</i>             | –              | string | City ring to which the block belongs to |
| <i>fraction_grass</i>   | –              | float  | Fraction of grass per block             |
| <i>fraction_trees</i>   | –              | float  | Fraction of trees per block             |

135

File formats and further meta information for shadow fraction are given in Table S17, data attributes in Table S18.

**Table S17.** Files formats and meta information for the dataset related to grass and trees fraction.

|                             |                                        |
|-----------------------------|----------------------------------------|
| Filename(s)                 | <i>Shadow_fraction_Block (Sel_PLR)</i> |
| Coordinate reference system | EPSG 25833; ETRS89 / UTM zone 33N      |
| Format, type                | ESRI shapefile; polygons               |
| Resolution                  | Block, vector                          |
| Reference year              | Summer (2022)                          |
| Dataset attributes          | Table S18                              |

**Table S18.** Dataset (Table S17) attributes.

| Attribute name          | Unit           | Type   | Description                             |
|-------------------------|----------------|--------|-----------------------------------------|
| <i>schl5 *</i>          | –              | string | Unique ID of each block                 |
| <i>SHAPE_Length</i>     | m              | float  | Length of the block                     |
| <i>SHAPE_Area</i>       | m <sup>2</sup> | float  | Area of the block                       |
| <i>typklar_ENG</i>      | –              | string | UST of the block                        |
| <i>Typ_Klar_Broader</i> | –              | string | USTs new aggregated classes (Figure S1) |
| <i>Ring</i>             | –              | string | City ring to which the block belongs to |
| <i>fraction_shadow</i>  | –              | float  | Fraction of shadow per block            |

140

## S4. References

- Evasys GmbH: Evasys, Evasys GmbH, Konrad-Zuse-Allee 13, 21337 Lüneburg, Germany, 2021.
- Geoportal Berlin. Amtliches Liegenschaftskatasterinformationssystem ALKIS Berlin,  
<https://www.berlin.de/sen/sbw/stadtdaten/geoportal/liegenschaftskataster/>, Download via FIS-Broker:  
 145 [https://fbinter.stadt-berlin.de/fb?loginkey=showMap&mapId=wmsk\\_alkis@senstadt](https://fbinter.stadt-berlin.de/fb?loginkey=showMap&mapId=wmsk_alkis@senstadt), last accessed: 13/12/2023, 2022a.
- Geoportal Berlin. ATKIS DGM - Digitales Geländemodell Berlin.  
<https://www.berlin.de/sen/sbw/stadtdaten/geoportal/landesvermessung/geotopographie-atkis/dgmdigitale-gelaendemodelle/>; downloaded via FIS-Broker:  
[https://fbinter.stadtberlin.de/fb?loginkey=showMap&mapId=k\\_dgm1@senstadt](https://fbinter.stadtberlin.de/fb?loginkey=showMap&mapId=k_dgm1@senstadt), last accessed: 13/12/2023, 2022b.
- 150 Geoportal Berlin. Building Age in Residential Development. <https://www.berlin.de/umweltatlas/en/land-use/building-age/>;  
 downloaded via FIS-Broker: <https://www.berlin.de/umweltatlas/en/land-use/building-age/>, last accessed: 13/06/2023,  
 2016.
- Geoportal Berlin. Impervious Soil Coverage 2021 (Soil Sealing). <https://www.berlin.de/umweltatlas/en/soil/impervious-soil-coverage/2021/summary/>; downloaded via FIS-Broker: [https://fbinter.stadt-](https://fbinter.stadt-berlin.de/fb/index.jsp?Szenario=fb_en&loginkey=zoomStart&mapId=ek01_02versiegelung2021@esenstadt&bbox=367786,5806155,418176,5831378)  
 155 [berlin.de/fb/index.jsp?Szenario=fb\\_en&loginkey=zoomStart&mapId=ek01\\_02versiegelung2021@esenstadt&bbox=367786,5806155,418176,5831378](https://fbinter.stadt-berlin.de/fb/index.jsp?Szenario=fb_en&loginkey=zoomStart&mapId=ek01_02versiegelung2021@esenstadt&bbox=367786,5806155,418176,5831378), last accessed: 13/06/2023, 2021.
- Geoportal Berlin. DOM - Digitales Oberflächenmodell Berlin. <https://www.berlin.de/sen/sbw/stadtdaten/geoportal/landesvermessung/geotopographie-atkis/domdigitales-oberflaechenmodell/>; downloaded via FIS-Broker:  
[https://fbinter.stadtberlin.de/fb?loginkey=showMap&mapId=k\\_dom1@senstadt](https://fbinter.stadtberlin.de/fb?loginkey=showMap&mapId=k_dom1@senstadt), last accessed: 13/12/2023, 2020.
- 160 Geoportal Berlin. Urban Structural Density - Floor Space Index (FSI) 2019. <https://www.berlin.de/umweltatlas/en/land-use/urban-structural-density/2019/summary/>; downloaded via FIS-Broker: [https://fbinter.stadt-](https://fbinter.stadt-berlin.de/fb/index.jsp?Szenario=fb_en&loginkey=zoomStart&mapId=ek06_09_01gfz2019@esenstadt&bbox=388091,5818152,394378,5821299)  
[berlin.de/fb/index.jsp?Szenario=fb\\_en&loginkey=zoomStart&mapId=ek06\\_09\\_01gfz2019@esenstadt&bbox=388091,5818152,394378,5821299](https://fbinter.stadt-berlin.de/fb/index.jsp?Szenario=fb_en&loginkey=zoomStart&mapId=ek06_09_01gfz2019@esenstadt&bbox=388091,5818152,394378,5821299), last accessed: 13/06/2023, 2021.
- Iqbal, N., Ravan, M., Mitraka, Z., Birkmann, J., Grimmond, S., Hertwig, D., Chrysoulakis, N., Somarakis, G., &  
 165 Wendnagel-Beck, A.: Datasets for: How does perceived heat stress differ between urban forms and human vulnerability profiles? – case study Berlin [Data set]. Zenodo. <https://doi.org/10.5281/zenodo.12192376>, 2024.
- Landesamt für Bürger- und Ordnungsangelegenheiten: Melderegister der Stadt Berlin, <https://www.berlin.de/labo/>, 2022.
- Lindberg, F. and Grimmond, C. S. B.: Nature of vegetation and building morphology characteristics across a city: Influence on shadow patterns and mean radiant temperatures in London, *Urban Ecosyst*, 14, 617–634,  
 170 <https://doi.org/10.1007/s11252-011-0184-5>, 2011.
- Marando, F., Heris, M. P., Zulian, G., Udías, A., Mentaschi, L., Chrysoulakis, N., Parastatidis, D., and Maes, J.: Urban heat island mitigation by green infrastructure in European Functional Urban Areas, *Sustainable Cities and Society*, 77, 103564, <https://doi.org/10.1016/j.scs.2021.103564>, 2022.
- Mitraka, Z., Stagakis, S., Lantzanakis, G., Tzelidi, D., Chrysoulakis, N., Gastellu-Etchegorry, J-P., Lindberg, F.,  
 175 Feigenwinter, C., Grimmond, S. URBANFLUXES Deliverable D8.4 Adaptation to Sentinels methodology and evaluation report, 2017.
- Senatsverwaltung für Stadtentwicklung und Wohnen: Urbane Struktur / Urbane Struktur - Flächentypen differenziert, <https://www.berlin.de/umweltatlas/en/land-use/urban-structure/>, last accessed: 2/03/2023, 2020.
